# Supplementary material
Source: publisher figshare collection journal article supplement (https://gsajournals.figshare.com/ndownloader/files/23187071)
Supplement: Supplementary file 1 [file 23187071]

|  | **ODB Read Mapping Coverages** | | |
| --- | --- | --- | --- |
|  | **Untrimmed** | **IQR Trim** | **Difference** |
| *Amphizoa insolens* DNA3784 | 8.58 | 8.58 | 0.00 |
| *Bembidion* sp. nr. *transversale* DNA2544 | 90.87 | 85.32 | -5.56 |
| *Bembidion lividulum* DNA4161 | 7.93 | 7.66 | -0.27 |
| *Chlaenius sericeus* DNA4821 | 27.96 | 25.78 | -2.18 |
| *Lionepha* *tuulukwa* DNA3782 | 11.12 | 11.12 | 0.00 |
| *Omoglymmius hamatus* DNA3783 | 5.79 | 4.93 | -0.85 |
| *Pterostichus melanarius* DNA3787 | 6.80 | 6.60 | -0.19 |
| *Trachypachus gibbsii* DNA3786 | 22.96 | 22.96 | 0.00 |

Table S12. OrthoDB read mapping mean coverages before (“Untrimmed”) and after (“IQR Trim”) removing outliers more than three interquartiles from the median. The column “Difference” is the difference between “IQR Trim” and “Untrimmed.”
